# Supplementary material
Source: MDPI journal article supplement (https://www.mdpi.com/2073-4441/13/13/1810)
Supplement: s1 [file s1]

**Supplementary material: Treatment of saline high strength bilgewater using lab scale Moving Bed Biofilm Reactors (MBBRs), tested with two different biocarrier types: microbial adaptation to organic, hydraulic and salinity load shocks.**

A. A. Mazioti, L. E. Koutsokeras, G. Constantinides, I. Vyrides

**Table S1:** Relative abundance, illustrated in Figure 4.

| System A                                    | R1aS-31d | R1aA-31d | R1bS-31d | R1bA-31d | R1aS-41d | R1aA-41d | R1bS-41d | R1bA-41d |
|---------------------------------------------|----------|----------|----------|----------|----------|----------|----------|----------|
| Betaproteobacteria, Thauera (g)             | 15.7     | 0.4      | 12.7     | 0.0      | 1.7      | 3.8      | 0.8      | 0.0      |
| Flavobacteriia, Flavobacterium (g)          | 13.1     | 3.8      | 11.9     | 0.0      | 7.5      | 11.2     | 3.4      | 0.0      |
| Alphaproteobacteria, Roseovarius (g)        | 12.9     | 19.6     | 10.9     | 0.0      | 5.1      | 10.7     | 2.7      | 0.0      |
| Alphaproteobacteria, Celeribacter (g)       | 4.5      | 4.0      | 0.2      | 0.0      | 29.6     | 6.5      | 37.2     | 0.0      |
| Alphaproteobacteria, Rhodobacteraceae (f)   | 3.1      | 6.8      | 0.6      | 0.0      | 2.8      | 2.9      | 0.4      | 0.0      |
| Alphaproteobacteria, Pseudodonghicola (g)   | 3.0      | 3.4      | 2.1      | 0.0      | 2.2      | 2.2      | 2.5      | 0.0      |
| Gammaproteobacteria, Thiogranum (g)         | 2.7      | 8.0      | 0.3      | 0.0      | 3.1      | 3.4      | 0.2      | 0.0      |
| Alphaproteobacteria, Stappia (g)            | 2.6      | 5.5      | 2.1      | 0.0      | 1.5      | 2.8      | 3.5      | 0.0      |
| Alphaproteobacteria, DB1-14                 | 2.6      | 1.1      | 0.6      | 0.0      | 0.8      | 1.1      | 0.3      | 0.0      |
| Alphaproteobacteria, T9d (f)                | 2.3      | 1.6      | 1.9      | 0.0      | 0.9      | 3.7      | 0.2      | 0.0      |
| Alphaproteobacteria, Hyphomicrobiaceae (f)  | 2.2      | 5.2      | 1.6      | 0.0      | 1.2      | 2.9      | 0.8      | 0.0      |
| Sphingobacteriia, Saprospiraceae (f)        | 2.1      | 1.9      | 24.8     | 0.0      | 2.7      | 5.1      | 17.7     | 0.0      |
| Alphaproteobacteria, Rhodobacter (g)        | 1.6      | 4.3      | 1.5      | 0.0      | 1.7      | 1.8      | 0.0      | 0.0      |
| Alphaproteobacteria, Actibacterium (g)      | 1.9      | 3.1      | 0.6      | 0.0      | 1.0      | 1.7      | 0.2      | 0.0      |
| Alphaproteobacteria, Rhizobium (g)          | 0.8      | 2.8      | 0.3      | 0.0      | 0.0      | 0.9      | 0.0      | 0.0      |
| Betaproteobacteria, Methyloversatilis (g)   | 1.9      | 2.6      | 0.0      | 0.0      | 1.6      | 2.2      | 0.0      | 0.0      |
| Deltaproteobacteria, GR-WP33-58 (f)         | 1.0      | 2.6      | 1.6      | 0.0      | 0.8      | 1.5      | 4.6      | 0.0      |
| Alphaproteobacteria, Sphingosinicella (g)   | 0.9      | 2.4      | 0.4      | 0.0      | 0.9      | 0.9      | 0.0      | 0.0      |
| Flavobacteriia, Flavobacterium (g)          | 1.1      | 0.8      | 2.6      | 0.0      | 1.1      | 1.8      | 1.1      | 0.0      |
| Gammaproteobacteria, Marinobacterium (g)    | 0.2      | 0.0      | 0.0      | 0.0      | 3.6      | 0.0      | 5.6      | 0.0      |
| Epsilonproteobacteria, Sulfurospirillum (g) | 0.0      | 0.0      | 0.0      | 0.0      | 5.2      | 0.7      | 1.2      | 0.0      |
| Clostridia, Acetobacterium (g)              | 0.4      | 0.0      | 0.0      | 0.0      | 2.4      | 4.8      | 0.8      | 0.0      |
| Betaproteobacteria, Parapusillimonas (g)    | 0.9      | 0.4      | 0.3      | 0.0      | 1.3      | 0.3      | 2.7      | 0.0      |
| Other < 2%                                  | 22.5     | 19.6     | 23.1     | 100.0    | 21.4     | 27.2     | 14.2     | 100.0    |

**Table S2:** Relative abundance, illustrated in Figure 5

| <b>R1a</b>                                                  | R1aS.I | R1aA.I | R1aS.II | R1aA.II | R1aS.III | R1aA.III |
|-------------------------------------------------------------|--------|--------|---------|---------|----------|----------|
| Bacteroidia,<br>Lentimicrobiaceae (f)                       | 2.3    | 4.1    | 4.0     | 6.0     | 1.3      | 1.6      |
| Alphaproteobacteria,<br>Rhodospirillaceae (f)               | 5.2    | 2.6    | 0.3     | 1.0     | 0.3      | 0.2      |
| Deltaproteobacteria,<br>Desulfoplanes (g)                   | 0.0    | 0.0    | 0.3     | 0.2     | 0.0      | 0.7      |
| Alphaproteobacteria,<br>Tistrella (g)                       | 1.2    | 2.4    | 4.5     | 6.0     | 2.6      | 2.2      |
| Alphaproteobacteria,<br>Tropicibacter (g)                   | 2.5    | 1.6    | 3.7     | 5.9     | 1.1      | 2.0      |
| Gammaproteobacteria,<br>Azoarcus (g)                        | 0.5    | 0.7    | 6.8     | 4.0     | 2.3      | 2.0      |
| Thermotogae,<br>Oceanotoga (g)                              | 0.1    | 0.0    | 0.0     | 0.0     | 0.1      | 0.1      |
| Bacteroidia,<br>Cytophagales (g)                            | 2.5    | 0.8    | 7.8     | 7.3     | 4.8      | 5.2      |
| Deinococci,<br>Truepera (g)                                 | 1.3    | 3.7    | 1.2     | 1.6     | 4.7      | 1.8      |
| Alphaproteobacteria,<br>Rhodobacteraceae (f)                | 5.5    | 3.7    | 2.0     | 2.3     | 1.3      | 1.6      |
| Gammaproteobacteria,<br>Halomonas (g)                       | 0.7    | 1.1    | 1.8     | 0.5     | 1.1      | 0.8      |
| Alphaproteobacteria,<br>Hyphomicrobiaceae (f)               | 3.4    | 5.7    | 1.6     | 1.2     | 2.1      | 1.1      |
| Bacteroidia,<br>Membranicola (g)                            | 0.3    | 0.5    | 0.2     | 0.5     | 0.1      | 0.2      |
| Clostridia,<br>FamilyXI (f)                                 | 1.9    | 0.3    | 2.3     | 1.5     | 1.4      | 1.1      |
| Sericytochromatia,<br>Hyaloperonospora<br>arabidopsidis (g) | 0.1    | 0.1    | 1.0     | 1.7     | 0.2      | 0.3      |
| Bacteroidia,<br>Prolixibacteraceae (f)                      | 1.8    | 1.7    | 4.2     | 3.5     | 3.8      | 6.2      |
| Deltaproteobacteria,<br>Desulfovibrio (g)                   | 0.1    | 0.0    | 0.1     | 0.1     | 0.2      | 0.7      |
| Alphaproteobacteria,<br>Paracoccus (g)                      | 0.2    | 0.3    | 0.1     | 0.0     | 0.1      | 0.1      |
| Gracilibacteria                                             | 0.1    | 0.0    | 0.1     | 0.0     | 6.8      | 4.7      |
| Bacteroidia,<br>Xanthomarina (g)                            | 0.1    | 0.1    | 0.5     | 0.2     | 0.4      | 0.3      |
| Deltaproteobacteria,<br>Nannocystaceae (f)                  | 0.1    | 0.0    | 0.0     | 0.0     | 0.1      | 0.0      |
| Bacteroidia,<br>Bacteroides (g)                             | 0.0    | 0.0    | 0.0     | 0.0     | 0.1      | 0.1      |
| Negativicutes,<br>Acidaminococcaceae (f)                    | 0.0    | 0.0    | 0.0     | 0.0     | 0.0      | 0.1      |
| Other < 5%                                                  | 70.3   | 70.4   | 57.7    | 56.4    | 65.2     | 66.9     |

| <b>R1b</b>                                    | R1bS.I | R1bA.I | R1bS.II | R1bA.II | R1bS.III | R1bA.III |
|-----------------------------------------------|--------|--------|---------|---------|----------|----------|
| Bacteroidia,<br>Lentimicrobiaceae (f)         | 2.6    | 7.1    | 10.1    | 10.8    | 13.7     | 12.0     |
| Alphaproteobacteria,<br>Rhodospirillaceae (f) | 16.0   | 13.2   | 0.7     | 1.0     | 0.4      | 1.4      |

|                                                       |      |      |      |      |      |      |
|-------------------------------------------------------|------|------|------|------|------|------|
| Deltaproteobacteria, Desulfoplanes (g)                | 0.0  | 0.0  | 0.7  | 0.3  | 0.1  | 0.1  |
| Alphaproteobacteria, Tistrella (g)                    | 3.4  | 3.4  | 4.7  | 3.1  | 2.5  | 10.8 |
| Alphaproteobacteria, Tropicibacter (g)                | 2.2  | 2.5  | 5.4  | 3.9  | 1.6  | 2.7  |
| Gammaproteobacteria, Azoarcus (g)                     | 0.5  | 0.6  | 3.4  | 7.8  | 7.1  | 9.5  |
| Thermotogae, Oceanotoga (g)                           | 0.1  | 0.0  | 0.0  | 0.0  | 0.1  | 0.1  |
| Bacteroidia, Cytophagales (g)                         | 1.3  | 0.5  | 1.7  | 0.4  | 1.1  | 0.3  |
| Deinococci, Truepera (g)                              | 0.4  | 0.4  | 0.5  | 1.0  | 0.5  | 0.2  |
| Alphaproteobacteria, Rhodobacteraceae (f)             | 2.1  | 1.1  | 0.8  | 1.4  | 1.3  | 0.5  |
| Gammaproteobacteria, Halomonas (g)                    | 1.2  | 1.2  | 0.7  | 0.6  | 0.5  | 0.2  |
| Alphaproteobacteria, Hyphomicrobiaceae (f)            | 1.4  | 1.4  | 0.4  | 0.6  | 0.8  | 0.5  |
| Bacteroidia, Membranicola (g)                         | 5.9  | 9.4  | 0.8  | 4.2  | 1.5  | 1.6  |
| Clostridia, FamilyXI (f)                              | 0.6  | 0.2  | 0.6  | 0.2  | 0.3  | 0.1  |
| Sericytochromatia, Hyaloperonospora arabidopsidis (g) | 0.1  | 0.2  | 1.1  | 0.9  | 4.4  | 6.0  |
| Bacteroidia, Prolixibacteraceae (f)                   | 3.2  | 2.5  | 1.7  | 1.5  | 2.0  | 0.6  |
| Deltaproteobacteria, Desulfovibrio (g)                | 0.1  | 0.0  | 0.2  | 0.1  | 0.3  | 0.6  |
| Alphaproteobacteria, Paracoccus (g)                   | 0.1  | 0.1  | 0.1  | 0.4  | 0.1  | 0.1  |
| Gracilibacteria                                       | 0.1  | 0.0  | 0.0  | 0.0  | 2.3  | 1.8  |
| Bacteroidia, Xanthomarina (g)                         | 0.1  | 0.0  | 0.2  | 0.2  | 0.1  | 0.0  |
| Deltaproteobacteria, Nannocystaceae (f)               | 0.1  | 0.0  | 0.9  | 0.3  | 8.2  | 4.7  |
| Bacteroidia, Bacteroides (g)                          | 0.0  | 0.0  | 0.0  | 0.0  | 0.1  | 0.1  |
| Negativicutes, Acidaminococcaceae (f)                 | 0.0  | 0.0  | 0.1  | 0.0  | 0.0  | 0.0  |
| Other < 5%                                            | 58.4 | 56.1 | 65.2 | 61.0 | 51.2 | 46.2 |

| <b>R2</b>                                  | R2S.I | R2A.I | R2S.II | R2A.II | R2S.III | R2A.III |
|--------------------------------------------|-------|-------|--------|--------|---------|---------|
| Bacteroidia, Lentimicrobiaceae (f)         | 1.9   | 9.8   | 2.2    | 10.5   | 1.0     | 3.0     |
| Alphaproteobacteria, Rhodospirillaceae (f) | 5.5   | 4.4   | 3.9    | 5.8    | 0.7     | 19.6    |
| Deltaproteobacteria, Desulfoplanes (g)     | 0.0   | 0.0   | 0.3    | 0.3    | 0.0     | 0.0     |
| Alphaproteobacteria, Tistrella (g)         | 0.8   | 1.5   | 1.1    | 2.3    | 0.5     | 1.2     |
| Alphaproteobacteria, Tropicibacter (g)     | 0.5   | 0.9   | 1.2    | 2.4    | 0.5     | 1.2     |
| Gammaproteobacteria, Azoarcus (g)          | 1.4   | 1.5   | 0.8    | 1.9    | 0.4     | 0.9     |

|                                                             |      |      |      |      |      |      |
|-------------------------------------------------------------|------|------|------|------|------|------|
| Thermotogae,<br>Oceanotoga (g)                              | 0.1  | 0.0  | 0.0  | 0.1  | 0.1  | 0.2  |
| Bacteroidia,<br>Cytophagales (g)                            | 0.3  | 0.2  | 2.5  | 0.9  | 1.8  | 0.6  |
| Deinococci,<br>Truepera (g)                                 | 0.3  | 0.4  | 2.1  | 1.1  | 6.8  | 0.4  |
| Alphaproteobacteria,<br>Rhodobacteraceae (f)                | 9.7  | 4.8  | 1.5  | 2.5  | 0.8  | 2.5  |
| Gammaproteobacteria,<br>Halomonas (g)                       | 2.1  | 3.1  | 0.6  | 2.2  | 0.5  | 0.8  |
| Alphaproteobacteria,<br>Hyphomicrobiaceae (f)               | 2.8  | 2.6  | 1.2  | 2.0  | 1.8  | 0.8  |
| Bacteroidia,<br>Membranicola (g)                            | 0.3  | 0.5  | 0.1  | 0.2  | 0.2  | 0.3  |
| Clostridia,<br>FamilyXI (f)                                 | 0.8  | 0.1  | 6.1  | 1.2  | 4.5  | 0.6  |
| Sericytochromatia,<br>Hyaloperonospora<br>arabidopsidis (g) | 0.2  | 0.3  | 0.2  | 0.2  | 0.1  | 0.4  |
| Bacteroidia,<br>Prolixibacteraceae (f)                      | 1.1  | 0.9  | 3.2  | 3.1  | 3.2  | 1.5  |
| Deltaproteobacteria,<br>Desulfovibrio (g)                   | 0.2  | 0.0  | 0.2  | 0.5  | 0.3  | 2.8  |
| Alphaproteobacteria,<br>Paracoccus (g)                      | 8.7  | 7.4  | 0.6  | 0.5  | 0.2  | 0.3  |
| Gracilibacteria                                             | 0.0  | 0.0  | 0.0  | 0.0  | 0.5  | 0.5  |
| Bacteroidia,<br>Xanthomarina (g)                            | 0.1  | 0.0  | 7.3  | 2.3  | 3.7  | 0.7  |
| Deltaproteobacteria,<br>Nannocystaceae (f)                  | 0.1  | 0.0  | 0.1  | 0.5  | 0.1  | 0.4  |
| Bacteroidia,<br>Bacteroides (g)                             | 0.0  | 0.0  | 0.0  | 0.1  | 0.1  | 0.9  |
| Negativicutes,<br>Acidaminococcaceae (f)                    | 0.0  | 0.0  | 0.1  | 0.0  | 0.0  | 0.0  |
| Other < 5%                                                  | 63.3 | 61.4 | 64.6 | 59.4 | 72.3 | 60.1 |

| IN                                                    | IN.I | IN.II | IN.III |
|-------------------------------------------------------|------|-------|--------|
| Bacteroidia, Lentimicrobiaceae (f)                    | n.a. | 0.3   | 0.6    |
| Alphaproteobacteria, Rhodospirillaceae (f)            | n.a. | 0.5   | 0.5    |
| Deltaproteobacteria, Desulfoplanes (g)                | n.a. | 56.6  | 0.4    |
| Alphaproteobacteria, Tistrella (g)                    | n.a. | 0.3   | 0.3    |
| Alphaproteobacteria, Tropicibacter (g)                | n.a. | 0.3   | 0.3    |
| Gammaproteobacteria, Azoarcus (g)                     | n.a. | 0.3   | 0.3    |
| Thermotogae, Oceanotoga (g)                           | n.a. | 0.0   | 16.8   |
| Bacteroidia, Cytophagales (g)                         | n.a. | 0.3   | 0.3    |
| Deinococci, Truepera (g)                              | n.a. | 0.0   | 0.4    |
| Alphaproteobacteria, Rhodobacteraceae (f)             | n.a. | 0.0   | 0.4    |
| Gammaproteobacteria, Halomonas (g)                    | n.a. | 0.0   | 0.2    |
| Alphaproteobacteria, Hyphomicrobiaceae (f)            | n.a. | 0.0   | 0.4    |
| Bacteroidia, Membranicola (g)                         | n.a. | 0.0   | 0.0    |
| Clostridia, FamilyXI (f)                              | n.a. | 0.2   | 0.4    |
| Sericytochromatia, Hyaloperonospora arabidopsidis (g) | n.a. | 0.0   | 0.0    |
| Bacteroidia, Prolixibacteraceae (f)                   | n.a. | 0.3   | 0.5    |
| Deltaproteobacteria, Desulfovibrio (g)                | n.a. | 13.0  | 22.4   |
| Alphaproteobacteria, Paracoccus (g)                   | n.a. | 0.0   | 0.0    |

|                                         |      |      |      |
|-----------------------------------------|------|------|------|
| Gracilibacteria                         | n.a. | 0.0  | 0.0  |
| Bacteroidia, Xanthomarina (g)           | n.a. | 0.0  | 0.0  |
| Deltaproteobacteria, Nannocystaceae (f) | n.a. | 0.0  | 0.0  |
| Bacteroidia, Bacteroides (g)            | n.a. | 0.2  | 7.6  |
| Negativicutes, Acidaminococcaceae (f)   | n.a. | 6.1  | 0.0  |
| Other < 5%                              | n.a. | 21.6 | 48.1 |

| Shannon Index |       |       |       |
|---------------|-------|-------|-------|
|               | I     | II    | III   |
| <b>IN</b>     | n.a.  | 1.688 | 2.932 |
| <b>R1a S</b>  | 3.862 | 3.74  | 3.850 |
| <b>R1a A</b>  | 3.760 | 3.717 | 3.940 |
| <b>R1b S</b>  | 3.473 | 3.598 | 3.473 |
| <b>R1b A</b>  | 3.294 | 3.532 | 3.334 |
| <b>R2 S</b>   | 3.480 | 3.719 | 3.801 |
| <b>R2 A</b>   | 3.395 | 3.719 | 3.579 |

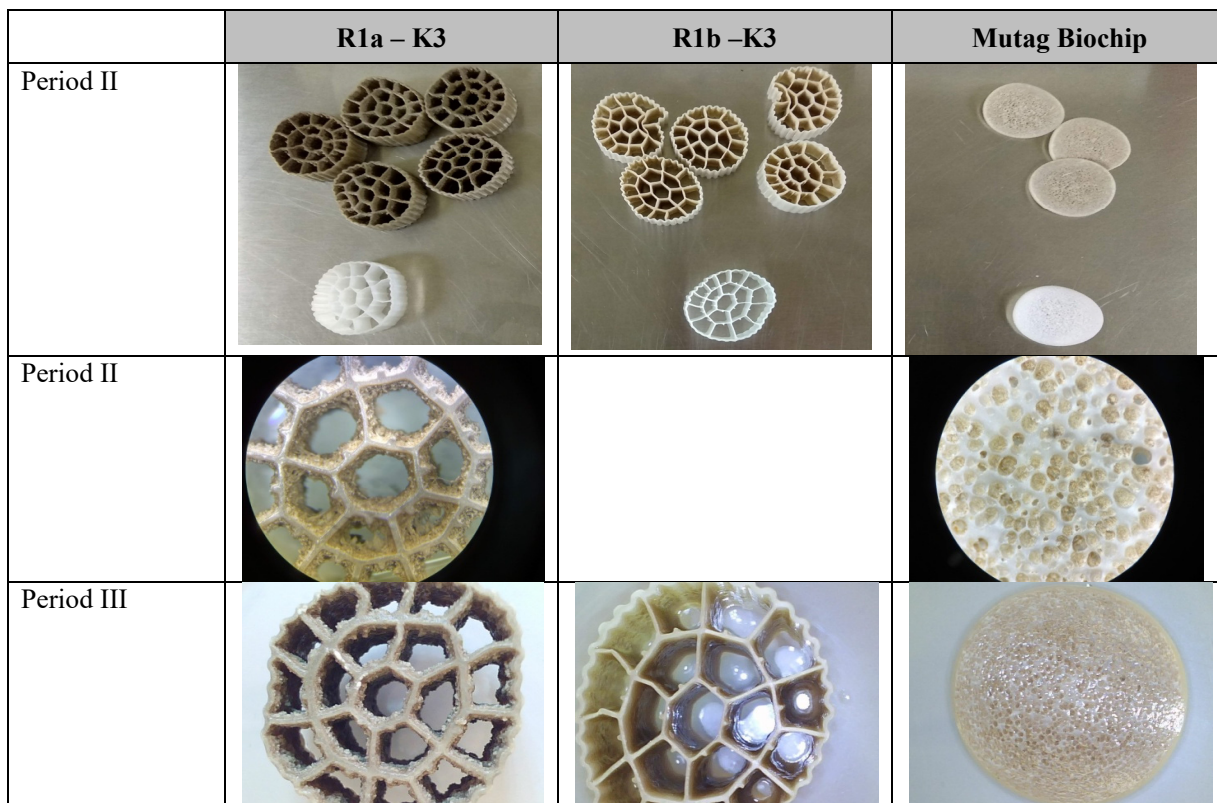

**Figure S1:** visual observation of dried biofilm

**Biocarrier Type** **EDX report**

**R1a**

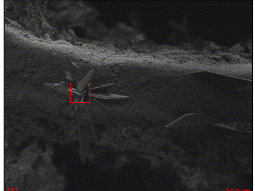

| Element | Wt%   | At%   |
|---------|-------|-------|
| CK      | 10.08 | 18.59 |
| OK      | 46.32 | 64.12 |
| NaK     | 00.29 | 00.28 |
| MgK     | 00.12 | 00.11 |
| CaK     | 27.36 | 15.12 |
| AuL     | 15.82 | 01.78 |

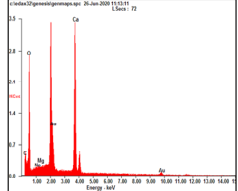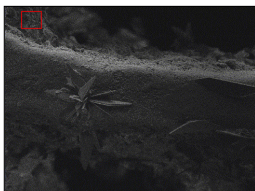

| Element | Wt%   | At%   |
|---------|-------|-------|
| CK      | 27.74 | 39.13 |
| NK      | 13.69 | 16.57 |
| OK      | 31.62 | 33.49 |
| NaK     | 01.58 | 01.17 |
| MgK     | 00.71 | 00.49 |
| AlK     | 00.15 | 00.09 |
| SiK     | 00.24 | 00.14 |
| PK      | 04.46 | 02.44 |
| SK      | 01.05 | 00.55 |
| CaK     | 12.80 | 05.41 |
| AuL     | 05.97 | 00.51 |

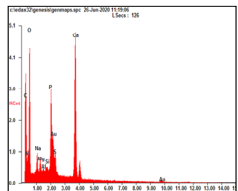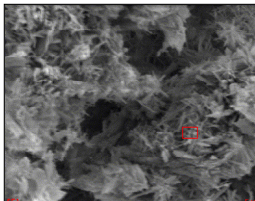

| Element | Wt%   | At%   |
|---------|-------|-------|
| CK      | 09.87 | 23.40 |
| OK      | 23.30 | 41.46 |
| NaK     | 00.79 | 00.98 |
| MgK     | 00.60 | 00.70 |
| CaK     | 42.43 | 30.13 |
| AuL     | 23.01 | 03.33 |

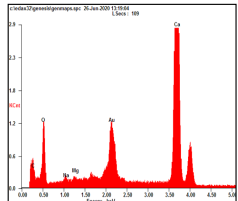

**R1b**

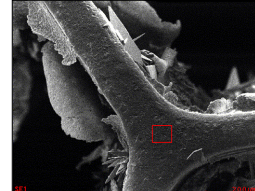

| Element | Wt%   | At%   |
|---------|-------|-------|
| CK      | 71.32 | 90.57 |
| OK      | 06.72 | 06.41 |
| NaK     | 00.85 | 00.57 |
| SiK     | 00.72 | 00.39 |
| CaK     | 01.59 | 00.60 |
| AuL     | 18.79 | 01.46 |

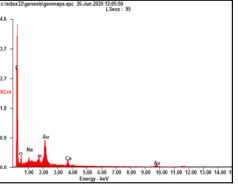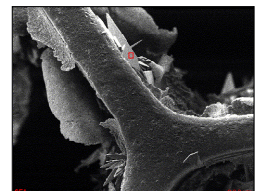

| Element | Wt%   | At%   |
|---------|-------|-------|
| CK      | 13.25 | 21.89 |
| OK      | 48.26 | 59.82 |
| PK      | 14.46 | 09.26 |
| CaK     | 16.78 | 08.30 |
| AuL     | 07.26 | 00.73 |

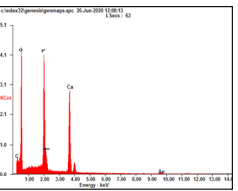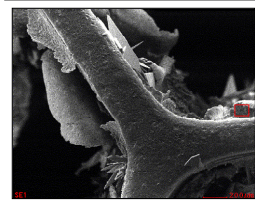

| Element | Wt%        | At%   |
|---------|------------|-------|
| CK      | 13.94      | 31.28 |
| OK      | 17.70      | 29.83 |
| NaK     | 00.83      | 00.98 |
| MgK     | 00.62      | 00.69 |
| AlK     | 00.19      | 00.19 |
| SiK     | 00.68      | 00.65 |
| PK      | 04.98      | 04.33 |
| SK      | 01.45      | 01.22 |
| CaK     | 42.32      | 28.46 |
| AuL     | 17.28      | 02.37 |
| Matrix  | Correction | ZAF   |

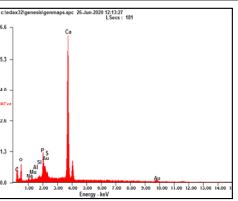

**Mutag  
BioChip**

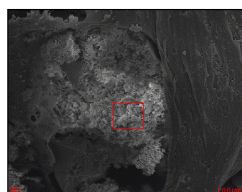

| Element | Wt%   | At%   |
|---------|-------|-------|
| CK      | 07.41 | 23.62 |
| OK      | 10.84 | 25.95 |
| NaK     | 00.99 | 01.65 |
| MgK     | 00.44 | 00.69 |
| AlK     | 00.40 | 00.56 |
| PK      | 09.16 | 11.33 |
| CaK     | 29.47 | 28.17 |
| AuL     | 41.31 | 08.03 |

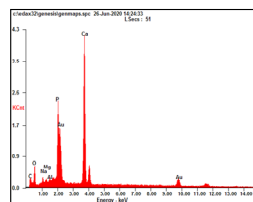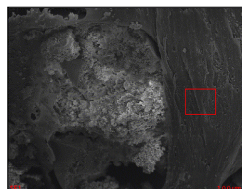

| Element | Wt%   | At%   |
|---------|-------|-------|
| CK      | 29.67 | 79.31 |
| OK      | 01.82 | 03.66 |
| AlK     | 02.00 | 02.38 |
| CaK     | 05.03 | 04.03 |
| TiK     | 01.19 | 00.80 |
| AuL     | 60.29 | 09.83 |

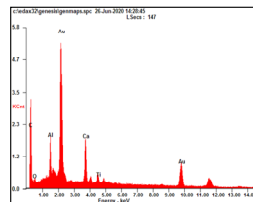

**Figure S2:** EDX report from biofilm and biocarriers
